# Supplementary material for: PSMA PET Imaging and Therapy in Adenoid Cystic Carcinoma and Other Salivary Gland Cancers: A Systematic Review
Source: MDPI journal article supplement (doi:10.3390/cancers14153585), 2022-07-22
Supplement: s1 [file s1]

**Table S1.** Overall weighted mean SUVmax for each adenoid cystic carcinoma patient [23].

| Patient                    | Subsite (no of Lesions)     | Mean SUVmax | Overall Mean Weighted SUVmax | Weighted Mean SUVmax for Local Recurrence Only | Weighted Mean SUVmax for Metastases Only |
|----------------------------|-----------------------------|-------------|------------------------------|------------------------------------------------|------------------------------------------|
| 1                          | Neck metastases (2)         | 9.15        |                              |                                                |                                          |
|                            | Lung metastases (53)        | 9.12        | 9.12                         |                                                | 9.12                                     |
| 2                          | Lung metastases (16)        | 7.76        | 7.76                         |                                                | 7.76                                     |
| 3                          | Lung metastases (51)        | 9.98        | 9.98                         |                                                | 9.98                                     |
| 4                          | Local recurrence (1)        | 13.80       |                              |                                                |                                          |
|                            | Lung metastases (10)        | 6.98        |                              |                                                |                                          |
|                            | Pleural metastasis (1)      | 6.6         |                              |                                                |                                          |
|                            | Pericardial metastases (2)  | 10.5        |                              |                                                |                                          |
|                            | Myocardial metastasis (1)   | 8.9         |                              |                                                |                                          |
|                            | Subcutaneous metastases (6) | 6.95        |                              |                                                |                                          |
|                            | Bone metastases (3)         | 11.1        | 8.13                         | 13.80                                          | 7.88                                     |
| 5                          | Lung metastases (18)        | 4.85        | 4.85                         |                                                | 4.85                                     |
| 6                          | Bone metastases (6)         | 10.68       | 10.68                        |                                                | 10.68                                    |
| 7                          | Local recurrence (1)        | 4.8         |                              |                                                |                                          |
|                            | Neck metastasis (1)         | 2.5         | 3.65                         | 4.8                                            | 2.5                                      |
| 8                          | Lung metastases (28)        | 5.29        | 5.29                         |                                                | 5.29                                     |
| 9                          | Pleural metastases (29)     | 6.37        |                              |                                                |                                          |
|                            | Bone metastasis (1)         | 5.9         | 6.35                         |                                                | 6.35                                     |
| 10                         | Lung metastases (27)        | 14.9        | 14.9                         |                                                | 14.9                                     |
| 11                         | Local recurrence (1)        | 10.6        |                              | 10.6                                           |                                          |
|                            | Kidney metastasis (1)       | 11.1        | 10.85                        |                                                | 11.1                                     |
| 12                         | Lung metastases (2)         | 7.8         | 7.8                          |                                                | 7.8                                      |
| 13                         | Lung metastases (30)        | 6.7         |                              |                                                |                                          |
|                            | Liver metastases (6)        | 10.6        | 7.35                         |                                                | 7.35                                     |
| 14                         | Lung metastasis (1)         | 6.2         |                              |                                                |                                          |
|                            | Bone metastases (4)         | 3.9         | 4.36                         |                                                | 4.36                                     |
| 15                         | Lung metastases (43)        | 4.38        | 4.38                         |                                                | 4.38                                     |
| Range mean SUVmax          |                             | 2.5-14.9    | 3.65 – 14.9                  | 4.8 – 13.8                                     | 2.5 – 14.9                               |
| Total weighted mean SUVmax |                             |             | 115.02                       | 29.2                                           | 114.3                                    |
| Weighted mean SUVmax       |                             |             | 7.67                         | 9.73                                           | 7.62                                     |

**Table S2.** Overall weighted mean SUVmax for each adenoid cystic carcinoma patient [19].

| Patient | Subsite (no of Lesions) | Mean SUVmax | Overall Mean Weighted SUVmax | Weighted Mean SUVmax for Local Recurrences Only | Weighted Mean SUVmax for Metastases Only | Tumour/Liver Ratio |
|---------|-------------------------|-------------|------------------------------|-------------------------------------------------|------------------------------------------|--------------------|
| 1       | Leptomenigeal           | 8.71        |                              |                                                 |                                          | 8.71/4.83 = 1.8    |
|         | Local recurrence        | 7.06        | 7.89                         | 7.06                                            | 8.71                                     | 7.06/4.83 = 1.46   |
| 2       | Lungs                   | 0           |                              |                                                 |                                          | -                  |
|         | Peritoneal              | 0           |                              |                                                 |                                          | -                  |

|                            |                  |         |             |             |              |                     |
|----------------------------|------------------|---------|-------------|-------------|--------------|---------------------|
|                            | Liver            | 0       |             |             | -            |                     |
|                            | Iliac crest      | 2.04    | 2.04        |             | 2.04         | $2.04/5.35 = 0.38$  |
| 3                          | Lungs            | 2.66    |             |             |              | $2.66/2.33 = 1.14$  |
|                            | Liver            | 4.01    | 3.34        |             | 3.34         | $4.01/2.33 = 1.72$  |
| 4                          | Intracranial     | 12.81   |             |             |              | $12.81/2.83 = 4.53$ |
|                            | Vertebra         | 3.47    | 8.14        |             | 8.14         | $3.47/2.83 = 1.23$  |
| 5                          | Leptomeningeal   | 2.42    |             |             |              | $2.42/3.24 = 0.75$  |
|                            | Local recurrence | 2.42    | 2.42        | 2.42        | 2.42         | $2.42/3.24 = 0.75$  |
| 6                          | Lungs            | 3.64    | 3.64        |             | 3.64         | $3.64/2.74 = 1.33$  |
| 7                          | Lungs            | 4.68    |             |             |              | $4.68/4.86 = 0.96$  |
|                            | Local recurrence | 2.41    | 3.55        | 2.41        | 4.68         | $2.41/4.86 = 0.50$  |
| 8                          | Local recurrence | 2.62    | 2.62        | 2.62        | -            | $2.62/3.82 = 0.69$  |
| 9                          | Iliac crest      | 12.97   |             |             |              | $12.97/4.89 = 2.65$ |
|                            | Lungs            | 6.66    | 9.82        |             | 9.82         | $6.66/4.89 = 1.36$  |
| Range mean SUVmax          |                  | 0-12.97 | 2.04 – 9.82 | 2.41 – 7.06 | 2.04 – 12.97 | 0.38 – 4.53         |
| Total weighted mean SUVmax |                  |         | 43.46       | 14.51       | 42.79        |                     |
| Weighted mean SUVmax       |                  |         | 4.83        | 3.63        | 5.35         |                     |

**Table S3.** Overall weighted mean SUVmax for each adenoid cystic carcinoma patient [34].

| Patient                    | Subsite (no of Lesions) | Mean SUVmax | Overall Mean Weighted SUVmax | Weighted Mean SUVmax for Local Recurrences Only | Weighted Mean SUVmax for Metastases Only |
|----------------------------|-------------------------|-------------|------------------------------|-------------------------------------------------|------------------------------------------|
| 1                          | Lung                    | 3.5         | 3.5                          |                                                 | 3.5                                      |
| 2                          | Intracranial            | 6.5         | 6.5                          |                                                 | 6.5                                      |
| 3                          | Pelvis                  | 10.2        | 10.2                         |                                                 | 10.2                                     |
| 6                          | Parapharyngeal          | 7.0         | 7.0                          | 7.0                                             |                                          |
| Range mean SUVmax          |                         | 3.5 – 10.2  | 3.5 – 10.2                   | -                                               | 3.5-10.2                                 |
| Total weighted mean SUVmax |                         |             | 27.2                         | 7.0                                             | 20.2                                     |
| Weighted mean SUVmax       |                         |             | 6.8                          | 7.0                                             | 6.73                                     |

**Table S4.** Overall weighted mean SUVmax for each adenoid cystic carcinoma patient (combined from Table S1, S2, S3 and findings from Konig et. al. (2017) [35]).

|                            | Mean SUVmax  | Overall Weighted Mean SUVmax | Weighted Mean SUVmax for Local Recurrences Only | Weighted Mean SUVmax for Metastases Only |
|----------------------------|--------------|------------------------------|-------------------------------------------------|------------------------------------------|
| Range mean SUVmax          | 2.04 – 23.35 | 2.04 – 23.35                 | 2.41 – 13.8                                     | 2.04 – 14.9                              |
| Total weighted mean SUVmax |              | 209.03                       | 50.71                                           | 177.29                                   |
| Weighted mean SUVmax       |              | 7.21                         | 6.33                                            | 6.82                                     |

**Table S5.** Overall weighted mean SUVmax per metastatic subsite for adenoid cystic carcinoma [19, 23, 34, 35].

| Subsite                       | Patient no (no of Lesions) | Mean SUVmax | Total Weighted Mean SUV max for Region |
|-------------------------------|----------------------------|-------------|----------------------------------------|
| Lung                          | 1 (53)                     | 9.12        |                                        |
|                               | 2 (16)                     | 7.76        |                                        |
|                               | 3 (51)                     | 9.98        |                                        |
|                               | 4 (10)                     | 6.98        |                                        |
|                               | 5 (18)                     | 4.85        |                                        |
|                               | 8 (28)                     | 5.29        |                                        |
|                               | 10 (27)                    | 14.9        |                                        |
|                               | 12 (2)                     | 7.8         |                                        |
|                               | 13 (30)                    | 6.7         |                                        |
|                               | 14 (1)                     | 6.2         |                                        |
|                               | 15 (43)                    | 4.38        |                                        |
|                               |                            |             |                                        |
|                               | 2 (x)                      | 0           |                                        |
|                               | 3 (1)                      | 2.66        |                                        |
|                               | 6 (1)                      | 3.64        |                                        |
|                               | 7 (1)                      | 4.68        |                                        |
|                               | 8 (1)                      | 6.66        |                                        |
|                               |                            |             |                                        |
|                               | 1 (1)                      | 3.5         | 7.94 (2.66 – 14.9)                     |
| Neck                          | 1 (2)                      | 9.15        |                                        |
|                               | 7 (1)                      | 2.5         | 6.93 (2.5 – 9.15)                      |
| Cardiac                       | 4 (2) Pericardium          | 10.5        |                                        |
|                               | 4 (1) myocardium           | 8.9         | 9.97 (8.9 – 10.5)                      |
| Bone                          | 4 (3)                      | 11.1        |                                        |
|                               | 6 (6)                      | 10.68       |                                        |
|                               | 9 (1)                      | 5.9         |                                        |
|                               | 14 (4)                     | 3.9         |                                        |
|                               |                            |             |                                        |
|                               | 2 (1)                      | 2.04        |                                        |
|                               | 4 (1)                      | 3.47        |                                        |
|                               | 9 (1)                      | 12.97       |                                        |
|                               |                            |             |                                        |
|                               | 3 (1)                      | 10.2        | 8.20 (2.04 – 12.97)                    |
| Subcutaneous                  | 4 (6)                      | 6.95        | 6.95                                   |
| Liver                         | 13 (6)                     | 10.6        |                                        |
|                               | 3 (1)                      | 4.01        | 8.45 (4.01 – 10.6)                     |
| Kidney                        | 11 (1)                     | 11.1        | 11.1                                   |
| Leptomeningeal & intracranial | 1 (1)                      | 8.71        |                                        |
|                               | 5 (1)                      | 2.42        |                                        |
|                               | 4 (1)                      | 12.81       |                                        |
|                               | 2 (1)                      | 6.5         | 7.61 (2.42 – 12.81)                    |
| Right maxillary sinus         | 1 (1)                      | 23.35       | 23.35                                  |

**Table S6.** Overall weighted mean SUVmax for other salivary gland cancer patients [23].

| Patient                    | Subsite (no of Lesions)     | Mean SUVmax | Overall Mean Weighted SUVmax | Weighted Mean SUVmax for Local Recurrence Only | Weighted Mean SUVmax for Metastases Only |
|----------------------------|-----------------------------|-------------|------------------------------|------------------------------------------------|------------------------------------------|
| 16                         | Neck metastases (2)         | 5.05        |                              |                                                |                                          |
|                            | Bone metastases (4)         | 3.45        | 3.98                         |                                                | 3.98                                     |
| 17                         | Neck metastasis (1)         | 5.8         |                              |                                                |                                          |
|                            | Lung metastases (5)         | 4.12        |                              |                                                |                                          |
|                            | Lymph nodes (12)            | 5.50        | 5.13                         |                                                | 5.13                                     |
| 18                         | Lymph node (1)              | 5.7         |                              |                                                |                                          |
|                            | Local recurrence (1)        | 10.9        |                              |                                                |                                          |
|                            | Bone metastasis (1)         | 10.2        | 8.93                         | 10.9                                           | 7.95                                     |
| 19                         | Neck metastases (3)         | 1.43        |                              |                                                |                                          |
|                            | Lung metastases (6)         | 1.78        |                              |                                                |                                          |
|                            | Lymph nodes (3)             | 4.87        | 2.47                         |                                                | 2.47                                     |
| 20                         | Local recurrence (1)        | 4.0         | 4.0                          | 4.0                                            | -                                        |
| 21                         | Brain metastases (13)       | 2.84        |                              |                                                |                                          |
|                            | Local recurrence (1)        | 16.8        |                              |                                                |                                          |
|                            | Bone metastases (23)        | 14.27       | 10.32                        | 16.8                                           | 10.14                                    |
| 22                         | Lung metastases (28)        | 5.24        |                              |                                                |                                          |
|                            | Lymph nodes (4)             | 4.73        |                              |                                                |                                          |
|                            | Liver metastases (7)        | 8.81        |                              |                                                |                                          |
|                            | Bone metastases (8)         | 5.14        |                              |                                                |                                          |
|                            | Subcutaneous (2)            | 2.10        | 5.56                         |                                                | 5.56                                     |
| 23                         | Bone metastases (22)        | 6.20        | 6.2                          |                                                | 6.2                                      |
| 24                         | Lung metastases (13)        | 1.85        | 1.85                         |                                                | 1.85                                     |
| 25                         | Neck metastases (7)         | 4.63        |                              |                                                |                                          |
|                            | Lung metastasis (1)         | 4.5         |                              |                                                |                                          |
|                            | Pericardial metastasis (1)  | 3.2         |                              |                                                |                                          |
|                            | Lymph nodes (4)             | 3.83        |                              |                                                |                                          |
|                            | Subcutaneous metastasis (1) | 2.9         | 1.20                         |                                                | 1.20                                     |
| Range mean SUVmax          |                             | 1.43-16.8   | 1.2-10.32                    | 4.0 – 16.8                                     | 1.43-14.27                               |
| Total weighted mean SUVmax |                             |             | 49.64                        | 31.7                                           | 44.48                                    |
| Weighted mean SUVmax       |                             |             | 4.96                         | 10.57                                          | 4.94                                     |

**Table S7.** Overall weighted mean SUVmax for other salivary gland cancer patients [34].

| Patient | Subsite (no of Lesions) | Mean SUVmax | Overall Mean Weighted SUVmax | Weighted Mean SUVmax For Local Recurrences Only | Weighted Mean SUVmax for Metastases Only |
|---------|-------------------------|-------------|------------------------------|-------------------------------------------------|------------------------------------------|
| 4       | Pelvis (1)              | 12.5        |                              |                                                 | 12.5                                     |
| 5       | Pelvis (1)              | 9.7         |                              |                                                 | 9.7                                      |

|                            |            |            |   |            |
|----------------------------|------------|------------|---|------------|
| Range mean SUVmax          | 9.7 – 12.5 | 9.7 – 12.5 | - | 9.7 – 12.5 |
| Total weighted mean SUVmax |            | 22.2       | - | 22.2       |
| Weighted mean SUVmax       |            | 11.1       | - | 11.1       |

**Table S8.** Overall weighted mean SUVmax for each other salivary gland cancer patient (combined from S6 and S7).

|                            | Mean SUVmax | Overall Weighted Mean SUVmax | Weighted Mean SUVmax for Local Recurrences Only | Weighted Mean SUVmax for Metastases Only |
|----------------------------|-------------|------------------------------|-------------------------------------------------|------------------------------------------|
| Range mean SUVmax          | 1.43-16.8   | 1.2 – 12.5                   | 4.0 – 16.8                                      | 1.43-14.27                               |
| Total weighted mean SUVmax |             | 71.84                        | 31.7                                            | 66.68                                    |
| Weighted mean SUVmax       |             | 5.99                         | 10.57                                           | 6.06                                     |

**Table S9.** Overall weighted mean SUVmax per metastatic subsite for other salivary gland cancer patients [23].

| Subsite      | Patient no (No of lesions) | Mean SUVmax | Total weighted mean SUV max for region |
|--------------|----------------------------|-------------|----------------------------------------|
| Lung         | 17 (5)                     | 4.12        |                                        |
|              | 19 (6)                     | 1.78        |                                        |
|              | 22 (28)                    | 5.24        |                                        |
|              | 24 (13)                    | 1.85        |                                        |
|              | 25 (1)                     | 4.5         | 3.90 (1.78 – 5.24)                     |
| Lymph nodes  | 17 (12)                    | 5.50        |                                        |
|              | 18 (1)                     | 5.7         |                                        |
|              | 19 (3)                     | 4.87        |                                        |
|              | 22 (4)                     | 4.73        |                                        |
|              | 25 (4)                     | 3.83        | 5.02 (3.83 – 5.7)                      |
| Neck         | 16 (2)                     | 5.05        |                                        |
|              | 17 (1)                     | 5.8         |                                        |
|              | 19 (3)                     | 1.43        |                                        |
|              | 25 (7)                     | 4.63        | 4.05 (1.43 – 5.8)                      |
| Cardiac      | 25 (1)                     | 3.2         | 3.2                                    |
| Bone         | 16 (4)                     | 3.45        |                                        |
|              | 18 (1)                     | 10.2        |                                        |
|              | 21 (23)                    | 14.27       |                                        |
|              | 22 (8)                     | 5.14        |                                        |
|              | 23 (22)                    | 6.2         |                                        |
|              | 4 (1)                      | 12.5        |                                        |
|              | 5 (1)                      | 9.7         | 9.19 (3.45 – 14.27)                    |
| Subcutaneous | 22 (2)                     | 2.10        |                                        |
|              | 25 (1)                     | 2.9         | 2.37 (2.1 – 2.9)                       |
| Liver        | 22 (7)                     | 8.81        | 8.81                                   |
| Intracranial | 21 (13)                    | 2.84        | 2.84                                   |
